# Supplementary material for: Novel familial distal imprinting centre 1 (11p15.5) deletion provides further insights in imprinting regulation
Source: PubMed Central journal article supplement (PMC6377752; doi:10.1186/s13148-019-0629-x), 2019-02-15

Suppl. Fig. 1

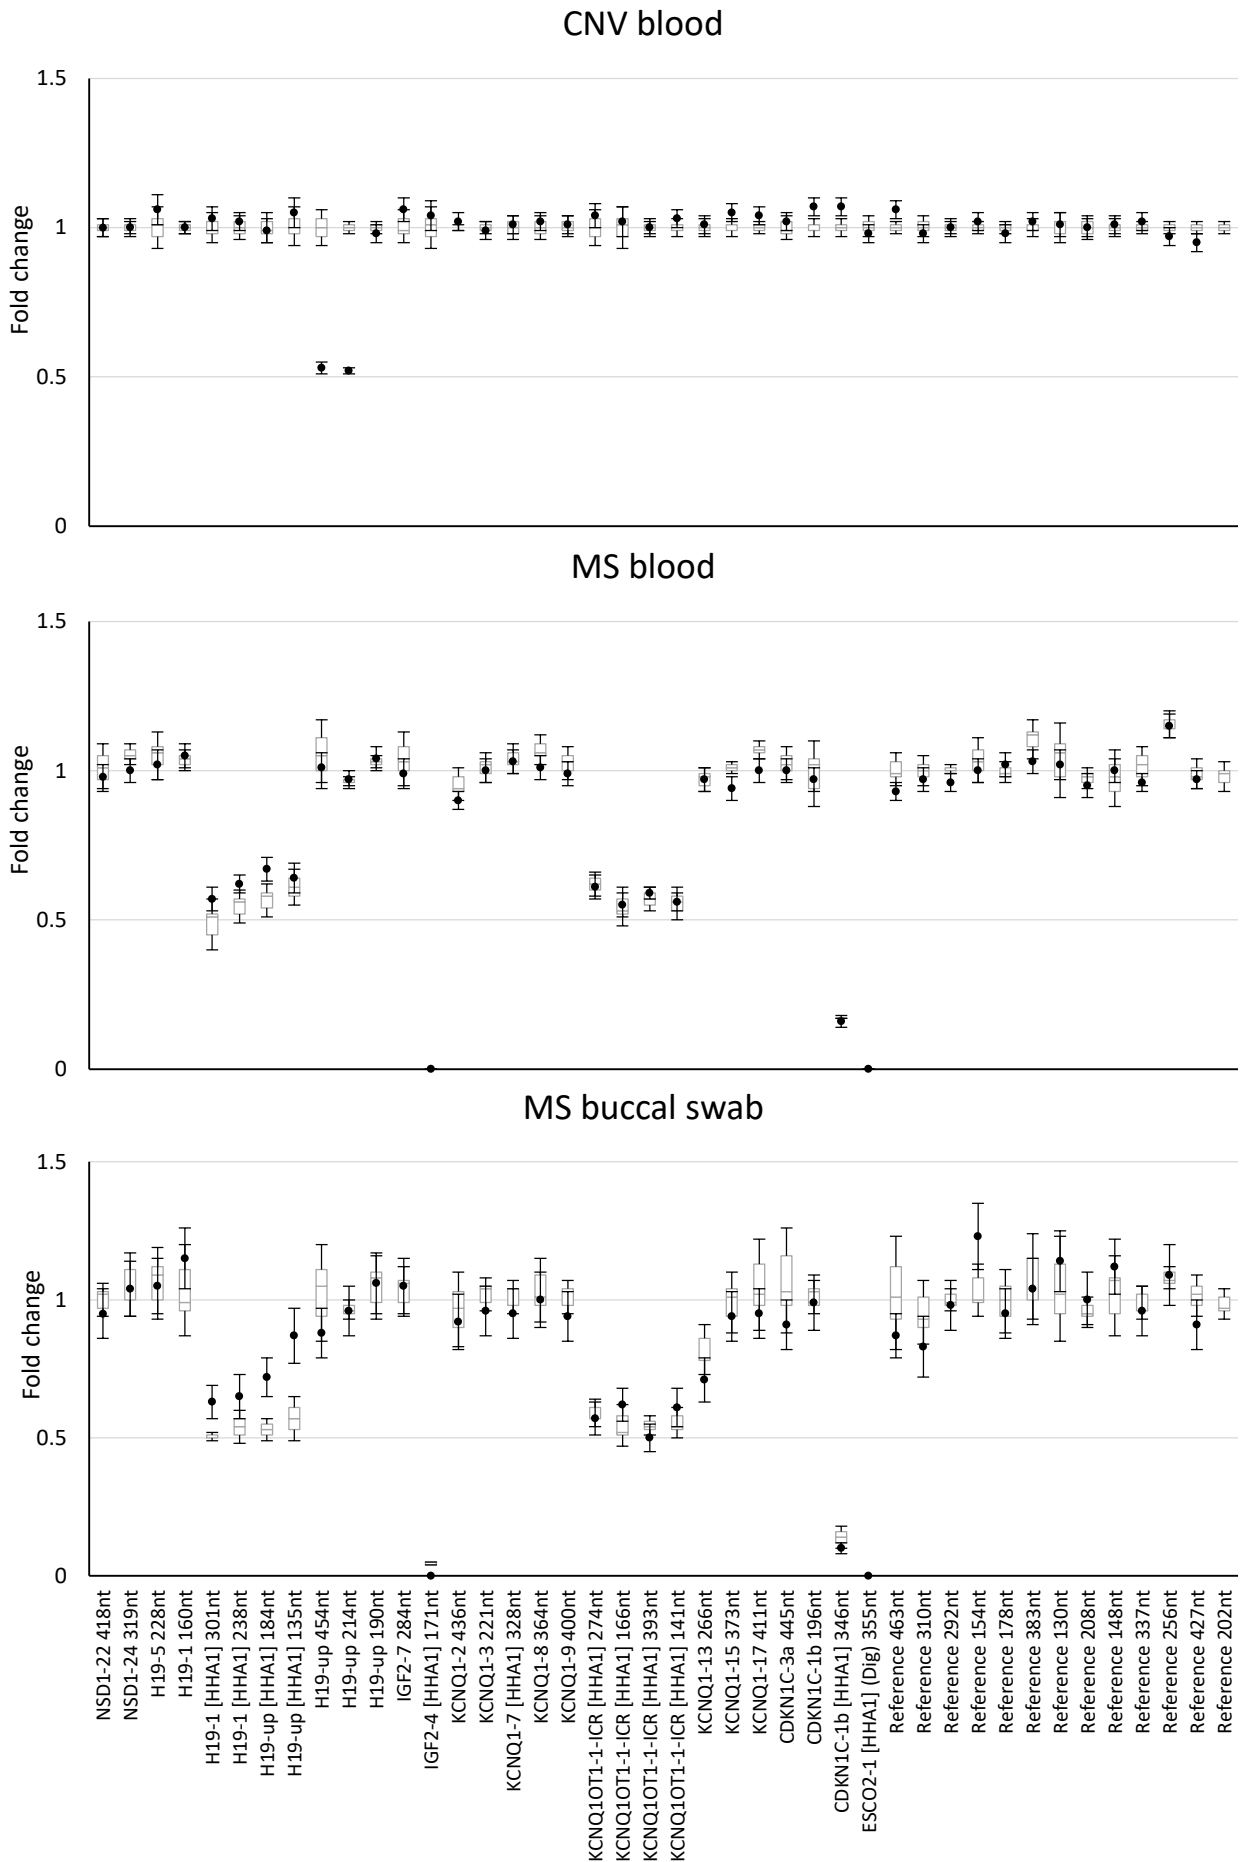

Supplement: 13148_2019_629_MOESM1_ESM.pdf [file 13148_2019_629_MOESM1_ESM.pdf]
